# Supplementary material for: Plasma cathepsin D activity is negatively associated with hepatic insulin sensitivity in overweight and obese humans
Source: Springer Nature journal article supplement (doi:10.1007/s00125-019-05025-2), 2019-11-05
Supplement: MOESM1 [file 17351316]

**Electronic supplementary material Table 1.** The correlation between plasma CTSD levels/activity and other metabolic parameters related to overweight and obesity.  $p < 0.05^*$  is statistically significant.

|                   | CTSD levels |                |                          | CTSD activity  |                          |
|-------------------|-------------|----------------|--------------------------|----------------|--------------------------|
|                   | N           | <i>p</i> value | Correlation coefficients | <i>p</i> value | Correlation coefficients |
| Hip circumference | 94          | 0.023*         | 0.244                    | 0.350          | 0.100                    |
| WHR               | 94          | 0.000*         | -0.417                   | 0.531          | -0.067                   |
| Fasting glucose   | 94          | 0.000*         | -0.456                   | 0.066          | -0.191                   |
| 2 h glucose       | 94          | 0.002*         | -0.324                   | 0.996          | 0.001                    |
| ALT               | 88          | 0.295          | -0.115                   | 0.594          | 0.058                    |
| NEFA              | 78          | 0.020*         | -0.268                   | 0.876          | -0.018                   |
| TAG               | 78          | 0.012*         | 0.289                    | 0.020*         | 0.263                    |
